# Supplementary material
Source: publisher site journal article supplement (https://www.dovepress.com/article/540319)
Supplement: Supplementary file 1 [file Supplementary%20materials%20540319.docx]

**Supplementary materials**

**Supplementary Figure 1 Overview of the antibiotic resistance mechanism of *Vibrio vulnificus***

**
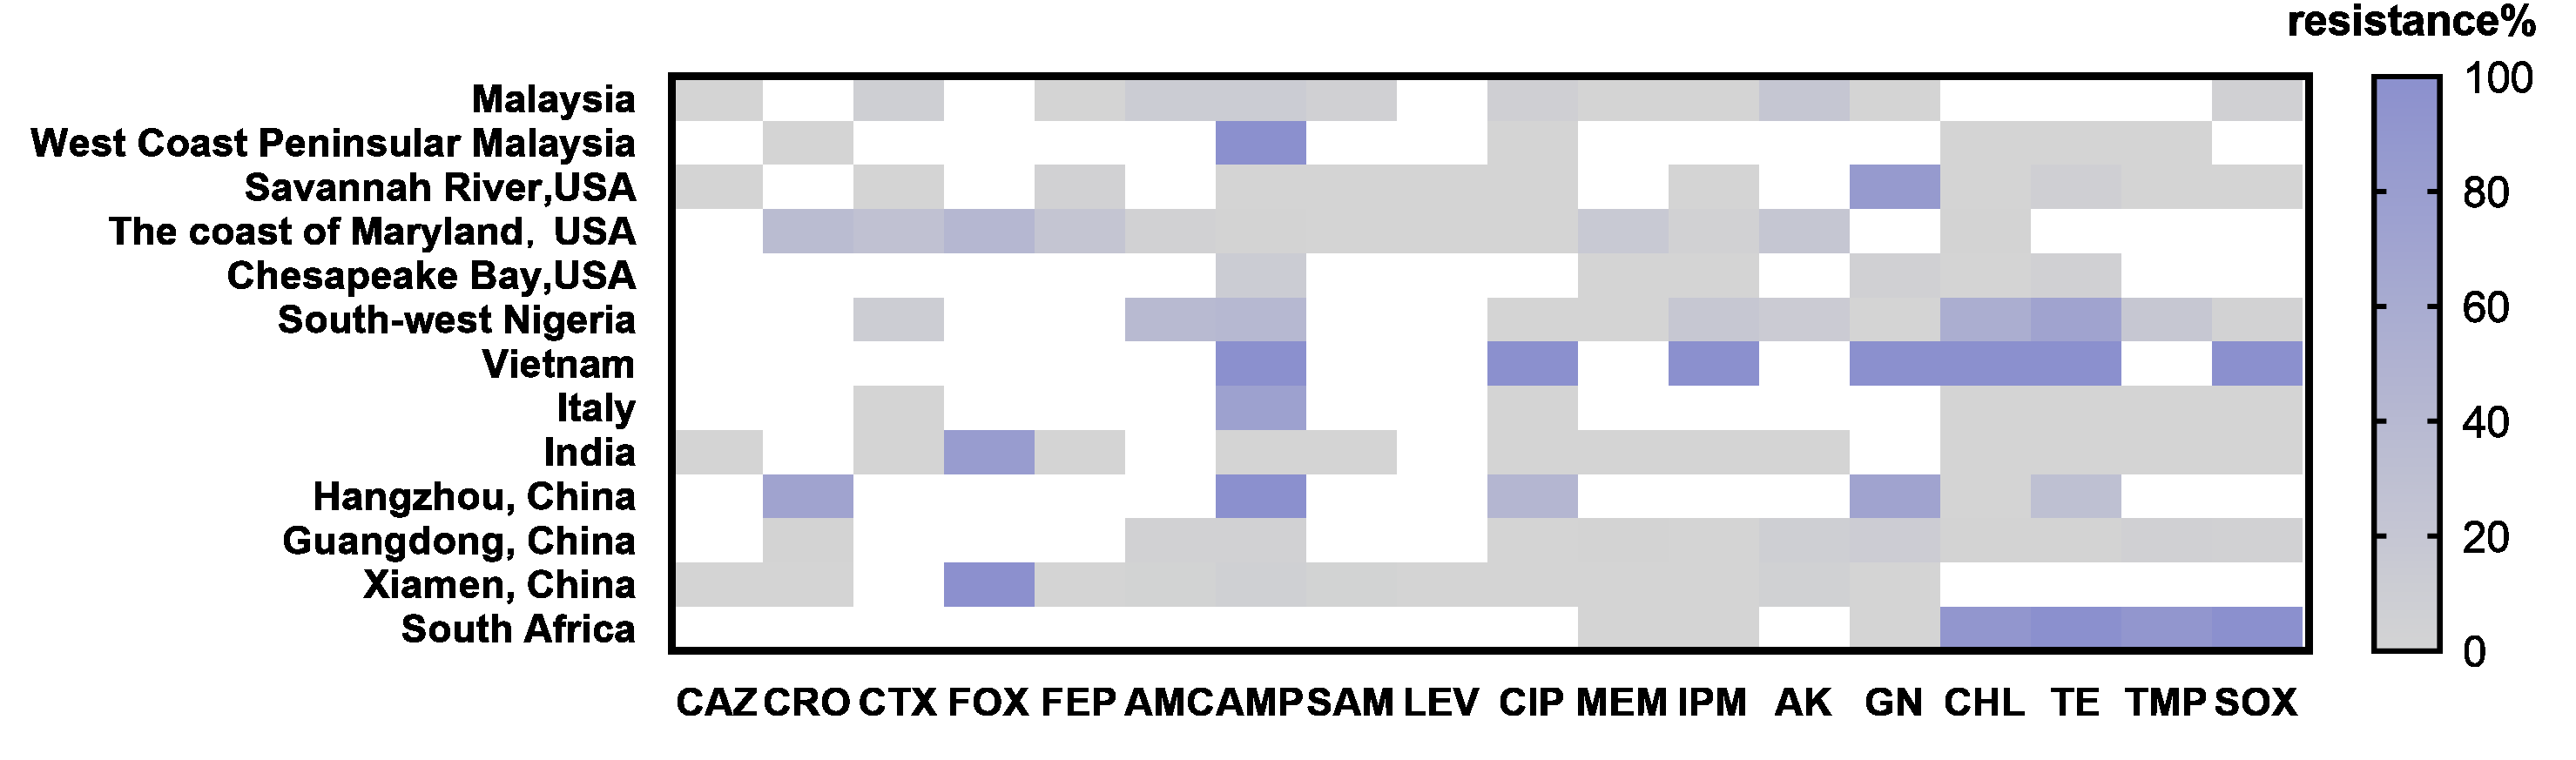
**

**Supplementary Figure 2 The mechanism of antibiotic resistance in *Vibrio vulnificus***


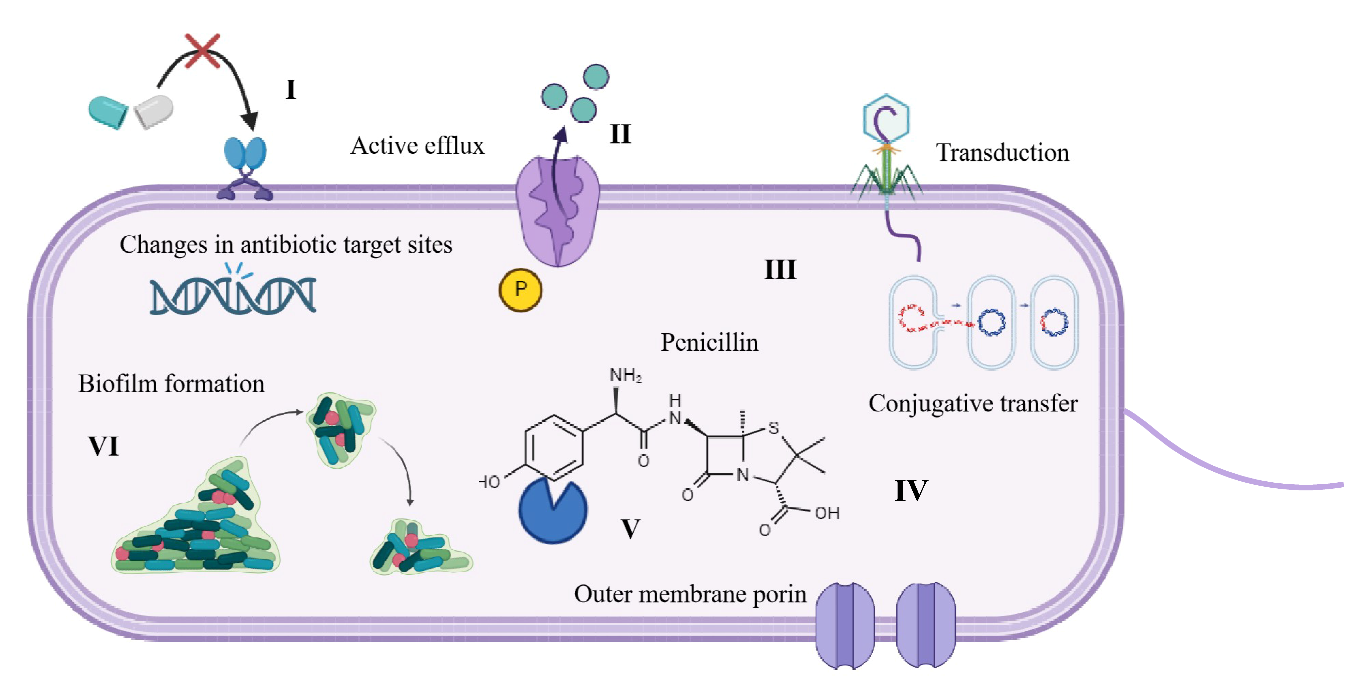


**Note:** I: Alteration of antibiotic target; II: Activation of active efflux pumps; III: Gene-level transfer; IV: Decreased cell membrane permeability; V: Drug-hydrolyzing enzymes; VI: Biofilm formation.

**Supplementary Table 1 Global Distribution Patterns of *Vibrio vulnificus* Prevalence**

| Country | Prevalence | References |
| --- | --- | --- |
| Northern Gulf of Mexico | 37% | [13] |
| Italy | 6.3% | [69] |
| Canada | 1-5% | [70] |
| Taiwan | 8.3% | [71] |
| Japan | 47.6% | [8] |
| China | 36.9% |
| India | 17.3% |
| Thailand | 16.3% |
| South Korea | 2.6% |
| Malaysia | 16.3% |
| Australia | 6.1% | [15] |
| United States | 18.8% | [72] |
| Germany | 19.8% | [73] |
| Africa | 8.5% | [16] |
| France | 12.6% | [74] |
| Brazil | 1% | [75] |
| Romania | 10.88% | [76] |
| New Zealand | 13.6% | [77] |

**Supplementary Table 2 Evolution of typing methods for Vibrio vulnificus virulence and ecological characteristics (1982–2017)**

| Time | Method | Principle | Clinical type | Environmental type | Clinical and environmental mix | Reference |
| --- | --- | --- | --- | --- | --- | --- |
| 1982 | Biota | Biochemical characteristics and host | Biotype 1 | Biotype 2 | Biotype 3（1999） | [17] |
| 2003 | 16SRNA | 17 nucleotide differences in 16s RNA gene sequences | Type B | Type A | Type AB | [20] |
| 2005 | virulence-related gene | Genotyping of virulence-associated genes | vcgC | vcgE | - | [64] |
| 2007 | MLST | Sequence diversity of 10 housekeeping genes | cluster II | cluster I | ST8 | [65] |
| 2009 | pilF polymorphism | Multiplex PCR | Positive | Negative | Positive | [66] |
| 2010 | D-mannitol fermentation | Mannitol fermentation model | Positive | Negative |  | [67] |
| 2011 | Single-nucleotide polymorphism (SNPS) | Sequence diversity of 4 housekeeping genes and 3 virulence-related genes | LI | LI、LIII | LII | [23] |
| 2017 | Piscis | Core genome | L1、L2、L4、L5 | L1、L2、L3 | L3 | [68] |
